# Supplementary material
Source: publisher site journal article supplement (https://www.dovepress.com/article/305126)
Supplement: Supplementary file 1 [file get_supplementary_file.php]

ORIGINAL RESEARCH

Ming-Hsueh Tsai et al

Cardiovascular risk associated with methotrexate versus retinoids in patients with psoriasis: a nationwide Taiwanese cohort study

Ming-Hsueh Tsai 1

Tom C. Chan 2

Meng-Sui Lee 3,4 *

Mei-Shu Lai 5

1 Department of Internal medicine, Taipei City Hospital, Taipei, Taiwan; 2 Department of Dermatology, National Taiwan University Hospital and College of Medicine, Taipei, Taiwan; 3 Department of Dermatology, Taipei City Hospital, Taipei, Taiwan; 4 Faculty of Medicine, National Yang-Ming University, Taipei, Taiwan; 5 Institute of Epidemiology and Preventive Medicine, College of Public Health, National Taiwan University, Taipei, Taiwan

Correspondence: Meng-Sui Lee

No. 33, Sec. 2, Zhonghua Road, Taipei 100, Taiwan (R.O.C.)

Tel +886 223 889 595#2225

Fax +886 223 889 595#2225

Email leemengsui@hotmail.com

Correspondence: Mei-Shu Lai

5Fl. No. 17, Hsu Chow Road,Taipei 100 ,Taiwan (R.O.C.)

Tel: 886-2-33668018

Fax: 886-2-23920456

Email: mslai@ntu.edu.tw

Supplementary Data

Index:

[Table S1. ICD-9-CM and Anatomical Therapeutic Chemical codes that were used in this study 3](#_Toc76333494)

[Appendix 1: Propensity score (PS) models with inverse probability treatment weighting (IPTW) 5](#_Toc76333495)

[Appendix 2: Sensitivity analysis 6](#_Toc76333496)

[Sensitivity analysis stratified on propensity score quintile 6](#_Toc76333497)

[Sensitivity analysis for unmeasured confounding 7](#_Toc76333498)

Table S1. ICD-9-CM and Anatomical Therapeutic Chemical codes that were used in this study

| **Hospitalisation for Cardiovascular morbidities** | **ICD-9-CM codes** (identified from the inpatient claims data) |
| --- | --- |
| Ischaemic heart disease | 410, 411, 413 |
| Ischaemic stroke | 433 or 434 |
| **Comorbidities** | **ICD-9-CM codes**(identified from the inpatient and outpatient claims data) |
| Hypertension | 401-405 |
| Diabetes | 250 |
| Dyslipidemia | 272 |
| Renal disease | 403.01, 403.11, 403.91, 404.02, 404.03, 404.12, 404.13, 404.92, 404.93, 580-589, V45.1, V56.0, V56.8 |
| Liver disease | 070.2x, 070.3x, V02.61, 070.41, 070.44, 070.51, 070.54, V02.62, 570-573 |
| Chronic lung disease | 490-496, 500-508 |
| **Medications** | **ATC codes** |
| Methotrexate | L01BA01, L04AX03 |
| Retinoid | D05BB |
| Angiotensin-converting enzyme inhibitors/angiotensin receptor blockers | C09 |
| Antihypertensive agents | C02 |
| Beta-blockers | C07 |
| Calcium channel blockers | C08 |
| Diuretics | C03 |
| Glucose-lowering drugs | A10 |
| Cholesterol-lowering drugs | C10A |
| Vitamin K antagonists | B01AA |
| Platelet inhibitors | B01AC |
| Nonsteroidal anti-inflammatory drugs | M01A |
| corticosteroids | H02A |
| Antidepressants | N06A |

ICD-9-CM, International Classification of Diseases, Ninth Revision, Clinical Modification; ATC, Anatomical Therapeutic Chemical.

# Appendix 1: Propensity score (PS) models with inverse probability treatment weighting (IPTW)

To balance the treatment and comparison groups in terms of observed covariates and adjust the measured factors associated with treatment receipt across time, we created sub-cohorts with calendar-year matching and employed calendar-year-specific PS with IPTW to create a pseudo-population. The inverse probability-of-treatment weight for participant *i* is adjusted for the measured baseline confounding variables . To stabilise the inverse probability-of-treatment weights, we multiplied them by the probability of treatment without considering covariates ().1 Formally, the stabilised weights are defined as

=

where is the baseline covariate and is the treatment.

# Appendix 2: Sensitivity analysis

## Sensitivity analysis stratified on propensity score quintile

Table S2. Hazard ratios of cardiovascular event comparing methotrexate with retinoid in patients with psoriasis stratified on propensity score quintile

| Methods | Crude HR  HR (95% CI) | Adjusted HR a  HR (95% CI) |
| --- | --- | --- |
| **Intention-to-treat** |  |  |
| Composite cardiovascular outcome b | 0.78 (0.71–0.85) | 0.84 (0.76−0.92) |
| Ischemic heart disease | 0.83 (0.71–0.97) | 0.87 (0.74−1.02) |
| Ischemic stroke | 0.95 (0.82–1.11) | 1.03 (0.88−1.20) |
| All-cause mortality | 0.69 (0.62–0.77) | 0.75 (0.67−0.84) |
| **As-treated** |  |  |
| Composite cardiovascular outcome b | 0.76 (0.61–0.94) | 0.90 (0.71−1.14) |
| Ischemic heart disease | 0.61 (0.43–0.87) | 0.62 (0.43−0.91) |
| Ischemic stroke | 0.96 (0.68–1.37) | 1.10 (0.76−1.59) |
| All-cause mortality | 0.65 (0.49–0.86) | 0.80 (0.59−1.09) |

a Adjusted hazard ratios were based on propensity score stratification.

b Cardiovascular outcome includes hospitalizations for ischemic heart disease, ischemic stroke, and all-cause mortality.

HR, hazard ratio; CI, confidence interval.

## Sensitivity analysis for unmeasured confounding

Even though the National Health Insurance (NHI) database provides a vast amount of medical information about patients, certain critical clinical parameters related to the adoption of treatments and behaviour that affects study outcomes (such as smoking or obesity) could not be obtained. Accordingly, we attempted to determine the degree to which unmeasured confounding factors cause spurious decreases in the observed effects associated with the use of index anti-psoriatic agents when none truly exists.2,3 With this aim, we performed an array approach using a multiplicative bias term for the unmeasured confounder to the apparent RR that does not account for unmeasured confounders as follows, Apparent RR = RRadjusted × (PC1 (RRCD-1)+1)/(PC0 (RRCD-1)+1), where RRCD is the association between the unmeasured confounder and the outcome of interest and P­C1 and PC0 are the prevalence of unmeasured confounders in the methotrexate (MTX) and retinoid user groups, respectively.

We assumed that unmeasured or unobserved confounders (such as smoking) with a risk for cardiovascular event of 1.7–1.9 and prevalence in retinoid users of 26%.4,5 The apparent RR of 0.84, which was based on our main analysis, was used to derive the adjusted RRs. We calculated a range of adjusted RRs (the ‘array’) by varying the proportion of unmeasured confounders in the MTX group (PC1 = 0.01–0.50) and RRs for the association between unmeasured confounders and cardiovascular event (RRCD = 1.0–5.0) and plotted them on a three-dimensional surface graph.

As shown in Supplementary Figure S1, when the prevalence of an unmeasured confounder in MTX users is <5%, the true effect would be toward the null value.2,3 This result shows that unmeasured potential confounders can be ruled out because they cannot possibly be some imbalance among exposure groups that is sufficiently strong to explain the observed association.

Figure S1 Sensitivity analysis for clarifying the influence of unmeasured smoking on cardiovascular disease outcome.

Explanation of the Array-Approach Sensitivity Analysis for an Unmeasured Confounder

Scenario: Confounder increases the risk of incident cardiovascular event and is more prevalent in the retinoid group.

1. We fixed the observed relative risk (ARR) to the upper limit of the confidence interval of the pooled hazard ratio for incident cardiovascular event, comparing MTX users to retinoid users (adjusted hazard ratio, 0.84, 95% CI 0.76-0.94).

2. We varied the association between the confounder and incident CVD (RRCD) from 1.0 to 5.0. In addition, we varied the prevalence of the confounder from 10% to 50% in the exposed and unexposed groups.

Abbreviations used:

ARR: Apparent (or observed) relative risk

RRCD: Association between the confounder and disease outcome

PC1: Prevalence of the confounder in the MTX group

PC0: Prevalence of the confounder in the Retinoid group

RRadjusted: Relative risk when adjusted for the unmeasured confounder

**References**

1. Hernan MA, Robins JM. Estimating causal effects from epidemiological data. *J Epidemiol Community Health.* 2006;60(7):578-586.

2. Schneeweiss S. Sensitivity analysis and external adjustment for unmeasured confounders in epidemiologic database studies of therapeutics. *Pharmacoepidemiol Drug Saf.* 2006;15(5):291-303.

3. Lee WC. Bounding the bias of unmeasured factors with confounding and effect-modifying potentials. *Stat Med.* 2011;30(9):1007-1017.

4. Jacobs DR, Jr., Adachi H, Mulder I, et al. Cigarette smoking and mortality risk: twenty-five-year follow-up of the Seven Countries Study. *Arch Intern Med.* 1999;159(7):733-740.

5. D’Agostino RB, Vasan RS, Pencina MJ, et al. General cardiovascular risk profile for use in primary care: The framingham heart study. *Circulation.* 2008;117(6):743-753.
